# Supplementary material for: Arctic spring and summertime aerosol optical depth baseline from long-term observations and model reanalyses – Part 2: Statistics of extreme AOD events, and implications for the impact of regional biomass burning processes
Source: Copernicus journal article supplement (doi:10.5194/acp-22-9949-2022), 2022-08-03
Supplement: Supplementary file 1 [file acp-22-9949-2022-supplement.pdf]

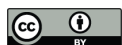

*Supplement of*

**Arctic spring and summertime aerosol optical depth baseline from long-term observations and model reanalyses – Part 2: Statistics of extreme AOD events, and implications for the impact of regional biomass burning processes**

**Peng Xian et al.**

*Correspondence to:* Peng Xian ([peng.xian@nrlmry.navy.mil](mailto:peng.xian@nrlmry.navy.mil))

The copyright of individual parts of the supplement might differ from the article licence.

1

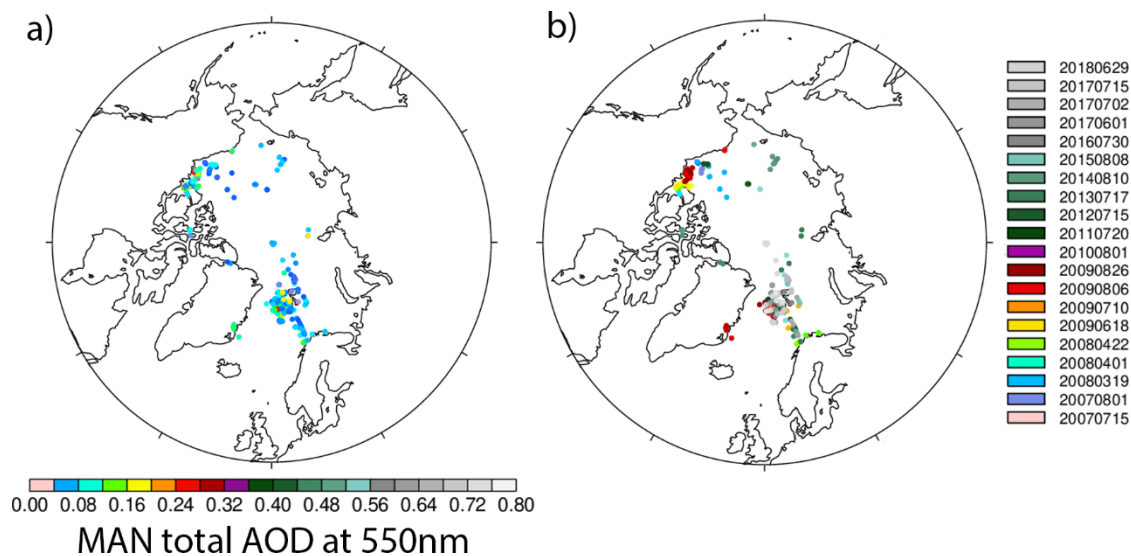

2

MAN total AOD at 550nm

3

4 **Figure S1.** MAN a) total AOD at 550nm for measurements collected north of 70°N and between  
 5 2003-2019, and b) measurement date in the format of year-month-date. 6-hrly AOD data is used.  
 6 The figure is the same as Fig. S1 in Part 1.

7

8

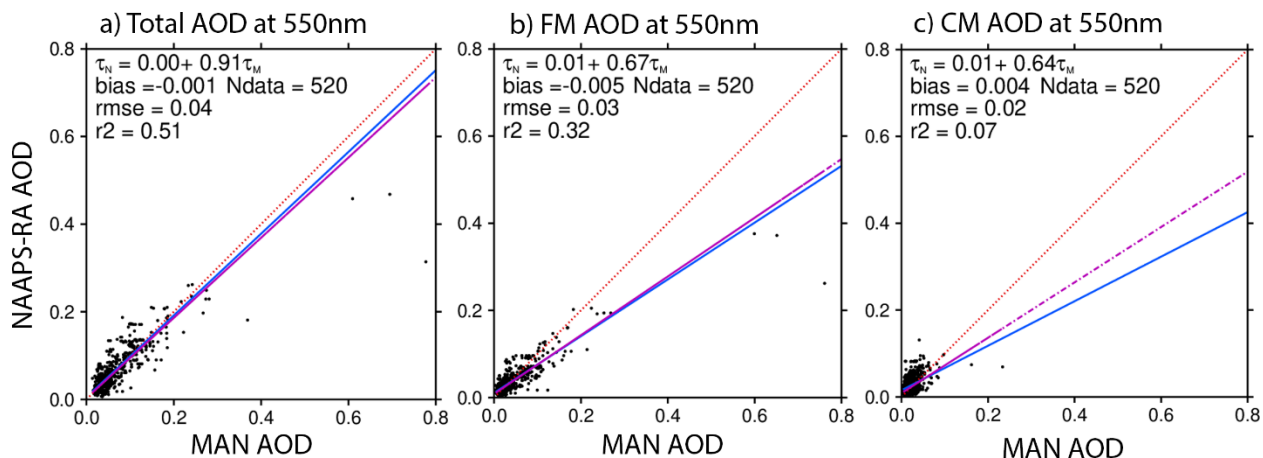

9

10 **Figure S2.** Pairwise comparison of the NAAPS-RA 6-hrly AOD and MAN AOD with respect to  
 11 total (left), fine (middle) and coarse (right) modes at 550 nm for north of 70°N for 2003–2019.  
 12 The solid magenta line represents a Theil–Sen linear regression and the corresponding equation  
 13 is shown, where  $\tau_N$  is the NAAPS-RA AOD and  $\tau_M$  is the MAN AOD. The solid blue line is a  
 14 least-squares linear regression and the corresponding equation is not shown. Also shown are the  
 15 bias, root mean square error (rmse), coefficient of determination ( $r^2$ ), total number of 6-hrly  
 16 MAN data (Ndata).

17

18

19

20 **Table S1.** Occurrence statistics of high-Arctic daily area-mean ( $>70^{\circ}\text{N}$ ) BB smoke AOD  
 21 extreme event. These are defined as days with smoke AOD  $>$  smoke AOD<sub>95</sub> ( $\sim 0.06$ ) based on  
 22 2003-2019 NAAPS-RA data. Years without an extreme smoke event are omitted but are counted  
 23 in the period average calculation. Cumulative extreme AOD is calculated as the sum of extreme  
 24 BB smoke AOD.

| year          | Extreme BB smoke days |     |     |     |     |              | max smoke<br>AOD | cumulative<br>extreme AOD |
|---------------|-----------------------|-----|-----|-----|-----|--------------|------------------|---------------------------|
|               | APR                   | MAY | JUN | JUL | AUG | Annual total |                  |                           |
| 2003          | 0                     | 9   | 16  | 0   | 0   | 25           | 0.14             | 2.4                       |
| 2004          | 0                     | 0   | 0   | 12  | 0   | 12           | 0.10             | 0.95                      |
| 2006          | 0                     | 0   | 0   | 4   | 0   | 4            | 0.16             | 0.49                      |
| 2008          | 4                     | 11  | 0   | 0   | 0   | 15           | 0.08             | 1.04                      |
| 2009          | 0                     | 0   | 0   | 0   | 5   | 5            | 0.07             | 0.32                      |
| 2003-2009 ave | 0.6                   | 2.9 | 2.3 | 2.3 | 0.7 | 8.7          | 0.08             | 0.74                      |
| 2010          | 0                     | 0   | 1   | 0   | 2   | 3            | 0.09             | 0.22                      |
| 2012          | 0                     | 0   | 0   | 3   | 0   | 3            | 0.08             | 0.22                      |
| 2014          | 0                     | 0   | 0   | 1   | 2   | 3            | 0.07             | 0.2                       |
| 2015          | 0                     | 0   | 2   | 17  | 0   | 19           | 0.11             | 1.51                      |
| 2016          | 0                     | 4   | 0   | 0   | 0   | 4            | 0.08             | 0.29                      |
| 2017          | 0                     | 0   | 0   | 0   | 13  | 13           | 0.17             | 1.27                      |
| 2019          | 0                     | 0   | 0   | 7   | 25  | 32           | 0.31             | 3.75                      |
| 2010-2019 ave | 0                     | 0.4 | 0.3 | 2.8 | 4.2 | 7.7          | 0.09             | 0.75                      |

25

26

27
